# Supplementary material for: Mortality Rates in a Diverse Cohort of Mechanically Ventilated Patients With Novel Coronavirus in the Urban Midwest
Source: PubMed Central journal article supplement — Crit Care Explor. 2020 Aug 20;2(8):e0187. doi: 10.1097/CCE.0000000000000187 (PMC7447481; doi:10.1097/cce.0000000000000187), 2020-08-20

**Mortality Rates in a Diverse Cohort of Mechanically Ventilated Patients with Novel  
Coronavirus in the Urban Midwest**

Homer L. Twigg III, MD; Sikandar H Khan, DO, MS; Anthony J. Perkins, MS; Scott  
Roberts, MD; Catherine Sears, MD; Omar Rahman, MD; Joseph P. Smith, MD; Rajat  
Kapoor, MD; Mark O. Farber, MD; Timothy Ellender, MD; Graham Carlos, MD, MS;  
Grant Gilroy, MD; John Buckley, MD; Gabriel Bosslet, MD; Roberto Machado, MD;  
Sujuan Gao, PhD; Babar A. Khan, MD, MS

Supplemental Digital Content

Figure E1. Flow Diagram of Patients Screened For Inclusion in the Cohort

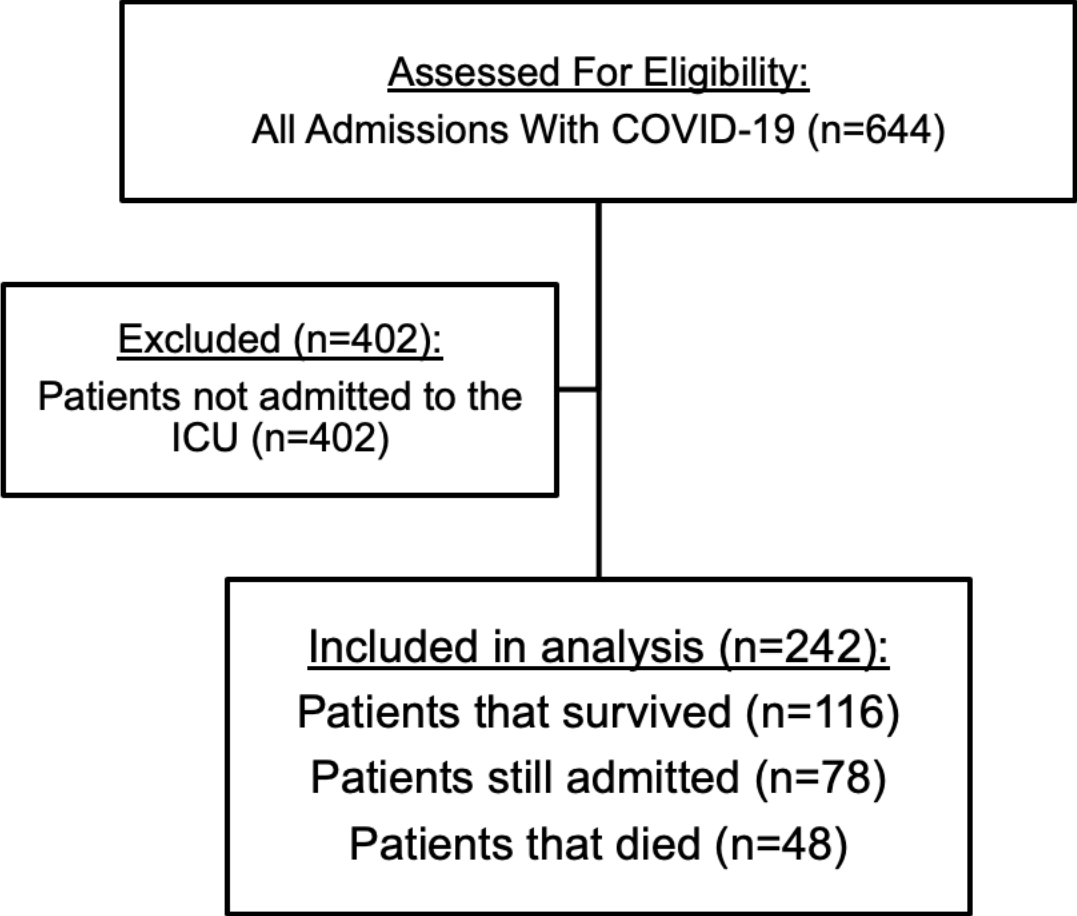

**Figure E2. Combined Ventilator Utilization in the Two Major Referral Hospital Systems**

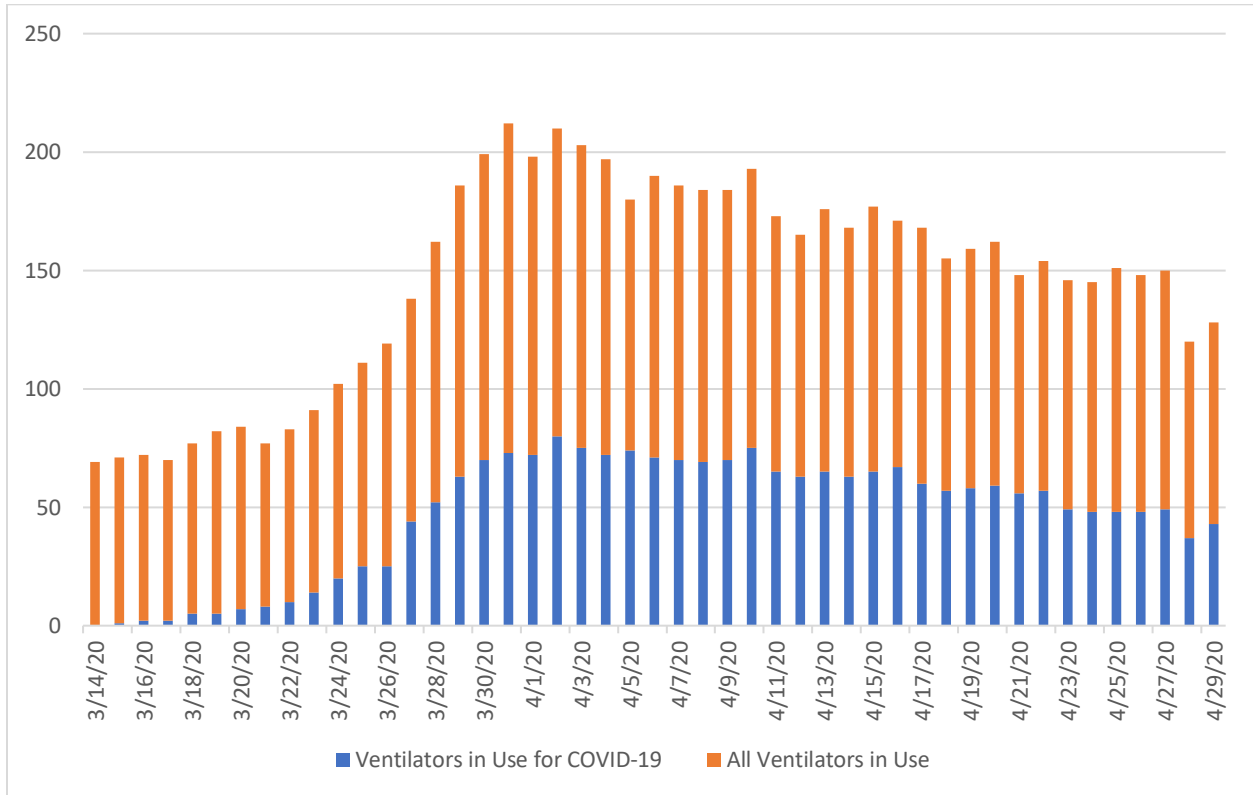

Supplement: cc9-2-e0187-s001.pdf [file cc9-2-e0187-s001.pdf]
